# Supplementary material for: Probing halogen⋯halogen interactions via thermal expansion analysis
Source: Royal Society of Chemistry journal article supplement (doi:10.1039/c7ce02167d), 2018-01-01
Supplement: c7ce02167d1.pdf [file c7ce02167d1.pdf]

# Electronic Supplementary Information for: Probing halogen···halogen interactions via thermal expansion analysis

Jeffrey S. Ovens and Daniel B. Leznoff\*

*Department of Chemistry, Simon Fraser University, 8888 University Drive, Burnaby,  
British Columbia, V5A 1S6, Canada*

E-mail: dleznoff@sfu.ca

## Experimental

### General procedures and materials

All reactions were performed in air.  $[\text{Cu}(\text{MeCN})_4]\text{OTf}$  and all  $[\text{Cat}][\text{AuX}_2(\text{CN})_2]$  starting materials were synthesized using literature procedures.<sup>1-7</sup> All other reagents were obtained from commercial sources and used as received.

Infrared spectra were measured on a Thermo Nicolet Nexus 670 FT-IR spectrometer equipped with Pike MIRacle attenuated total reflection (ATR) sampling accessory. Raman spectra were measured using a Renishaw inVia Raman microscope equipped with 785 and 514 nm lasers. Microanalyses (C, H, N) were performed by Paul Mulyk at Simon Fraser University on a Carlo Erba EA 1110 CHN elemental analyzer.

## Synthetic procedures

**Cu(MeCN)<sub>2</sub>[AuCl<sub>2</sub>(CN)<sub>2</sub>].** A 2 mL MeCN solution of [Cu(MeCN)<sub>4</sub>]OTf (0.05 mol·L<sup>-1</sup>; 0.1 mmol) was diluted to 5 mL with CH<sub>2</sub>Cl<sub>2</sub>. To this a 5 mL colourless solution of [<sup>n</sup>Bu<sub>4</sub>N]-[AuCl<sub>2</sub>(CN)<sub>2</sub>] (58 mg; 0.10 mmol) was added, resulting in a yellow solution. This solution was partially covered and set aside for slow evaporation. After a few hours, red block-shaped crystals of Cu(MeCN)<sub>2</sub>[AuCl<sub>2</sub>(CN)<sub>2</sub>] (**1**) formed, were collected by pipette and gently rinsed three times with CH<sub>2</sub>Cl<sub>2</sub> (19 mg; 41% yield). IR (cm<sup>-1</sup>): 2246(w; ν<sub>CN</sub>), 2202 (s; ν<sub>CN</sub>), 2163 (w; ν<sub>CN</sub>), 1362 (s), 1032 (w). Raman (cm<sup>-1</sup>): 2299 (br; ν<sub>CN</sub>), 2247(s; ν<sub>CN</sub>), 2217 (vs; ν<sub>CN</sub>), 1363 (m), 933 (w), 546 (m), 518 (m), 374 (m), 335 (vs; ν<sub>AuCl</sub>), 273 (sh). Anal calcd. for C<sub>6</sub>H<sub>6</sub>N<sub>4</sub>AuCl<sub>2</sub>Cu: C 15.48%, H 1.30%, N 12.03%; Found: C 15.31%, H 1.28%, N 11.90%.

**Cu(MeCN)<sub>2</sub>[AuBr<sub>2</sub>(CN)<sub>2</sub>] (**2**).** A 2 mL MeCN solution of [Cu(MeCN)<sub>4</sub>]OTf (0.05 mol·L<sup>-1</sup>; 0.1 mmol) was diluted to 5 mL with MeCN. To this a 10 mL yellow solution of [<sup>n</sup>Bu<sub>4</sub>N]-[AuBr<sub>2</sub>(CN)<sub>2</sub>] (62 mg; 0.095 mmol) was added, resulting in a yellow solution. This solution was partially covered and set aside for slow evaporation. After three days, red block-shaped crystals of Cu(MeCN)<sub>2</sub>[AuBr<sub>2</sub>(CN)<sub>2</sub>] (**2**) formed, were collected manually with tweezers then air dried (< 2 mg; < 5% yield). The low yield precluded EA and IR analysis. Raman (cm<sup>-1</sup>): 2303 (m; ν<sub>CN</sub>), 2273 (s; ν<sub>CN</sub>), 2207 (s; ν<sub>CN</sub>), 1362 (m), 936 (s), 522 (s), 395 (w), 206 (vs; ν<sub>AuBr</sub>).

**Cu(MeCN)<sub>2</sub>[AuI<sub>2</sub>(CN)<sub>2</sub>] (**3**).** A 2 mL MeCN solution of [Cu(MeCN)<sub>4</sub>]OTf (0.05 mol·L<sup>-1</sup>; 0.1 mmol) was diluted to 5 mL with MeCN. To this a 10 mL red solution of [<sup>n</sup>Bu<sub>4</sub>N][AuI<sub>2</sub>(CN)<sub>2</sub>] (77 mg; 0.10 mmol) was added, resulting in an orange solution. This solution was partially covered and set aside for slow evaporation. After three days, red plate-shaped crystals of Cu(MeCN)<sub>2</sub>[AuI<sub>2</sub>(CN)<sub>2</sub>] (**3**) formed, were collected manually with tweezers, then air dried (13 mg; 20% yield). IR (cm<sup>-1</sup>): 2207 (s; ν<sub>CN</sub>), 1472 (m), 1269 (m), 1029 (m). Raman (cm<sup>-1</sup>): 2205 (s; ν<sub>CN</sub>), 555 (m; shoulder), 527 (s), 376 (w), 327 (w), 142 (vs; ν<sub>AuI</sub>). Anal calcd. for C<sub>6</sub>H<sub>6</sub>N<sub>4</sub>AuCuI<sub>2</sub>: C 11.11%, H 0.93%, N 8.64%; Found: C 11.06%, H 0.95%, N 8.46%.

## X-ray crystallographic analysis

**Data collection.** All crystallographic data were collected on a Bruker SMART ApexII Duo diffractometer equipped with a Mo  $K\alpha$  ( $\lambda = 0.7109 \text{ \AA}$ ) Triumph-monochromated source and an Oxford Cryosystems cold stream. Single crystals of **1**, **2** and **3** were mounted on MiTeGen sample holders using paratone oil.

To prevent premature desolvation, crystals were introduced to the cold stream with a starting temperature of 270 K. Complete data sets were then collected at decreasing temperatures (every 15 K) from 270 K to 105 K, after which data were collected at increasing temperatures (every 40 K) from 120 K to 240 K, then 285 K and 300 K. The data collected upon heating from 120 K to 240 K were to confirm the absence of hysteresis effects. Data for each temperature was collected using three  $\omega$  scans, achieving a minimum completeness of 99.5% (to a resolution of 0.7  $\text{\AA}$ ) for all data sets.

**Data analysis.** All single crystal diffraction data were processed and initial solutions found with the Bruker ApexIII software suite. Subsequent refinements were performed in ShelXle.<sup>8</sup> Hydrogen atoms were placed geometrically and refined using a riding model. Thermal expansion coefficients along primary axes were determined using PASCAL.<sup>9</sup>

Structural diagrams were made using ORTEP-3<sup>10</sup> and POV-ray.<sup>11</sup> Additional crystallographic information can be found in Table S1, below.

Table S1: Crystallographic data (150 K) for compounds **1**, **2** and **3**.

|                                                         | <b>1</b>            | <b>2</b>            | <b>3</b>           |
|---------------------------------------------------------|---------------------|---------------------|--------------------|
| empirical formula                                       | $C_6H_6AuCl_2CuN_4$ | $C_6H_6AuBr_2CuN_4$ | $C_6H_6AuCuI_2N_4$ |
| formula weight ( $\text{g}\cdot\text{mol}^{-1}$ )       | 465.55              | 554.47              | 648.45             |
| crystal system                                          | monoclinic          | monoclinic          | monoclinic         |
| space group                                             | $C 2/c$             | $C 2/c$             | $C 2/c$            |
| $a$ ( $\text{\AA}$ )                                    | 15.304(3)           | 15.5179(11)         | 16.5670(16)        |
| $b$ ( $\text{\AA}$ )                                    | 6.2273(12)          | 5.9393(4)           | 5.5064(5)          |
| $c$ ( $\text{\AA}$ )                                    | 14.009(3)           | 14.8526(10)         | 15.8161(15)        |
| $\alpha$ (deg)                                          | 90                  | 90                  | 90                 |
| $\beta$ (deg)                                           | 115.285(2)          | 112.7690(10)        | 108.2580(10)       |
| $\gamma$ (deg)                                          | 90                  | 90                  | 90                 |
| $V$ ( $\text{\AA}^3$ )                                  | 1207.2(4)           | 1262.22(15)         | 1370.2(2)          |
| $Z$                                                     | 4                   | 4                   | 4                  |
| $T$ (K)                                                 | 150(2)              | 150(2)              | 150(2)             |
| $\rho_{\text{calcd}}$ ( $\text{g}\cdot\text{cm}^{-3}$ ) | 2.561               | 2.918               | 3.143              |
| $\mu$ ( $\text{mm}^{-1}$ )                              | 14.310              | 19.594              | 16.725             |
| $2\theta_{\text{max}}$ (deg)                            | 61.010              | 61.012              | 60.986             |
| total/unique reflections                                | 7610/1838           | 8073/1930           | 8733/2088          |
| reflections $[I_0 \geq 2\sigma(I_0)]$                   | 1589                | 1735                | 1990               |
| $R_1, wR_2$ $[I_0 \geq 2\sigma(I_0)]^a$                 | 0.0181, 0.0424      | 0.0158, 0.0352      | 0.0208, 0.0519     |
| goodness of fit                                         | 1.059               | 1.040               | 1.129              |
| CCDC number                                             | 1574364             | 1574365             | 1574366            |

<sup>a</sup>Function minimized:  $\Sigma w(F_o^2 - F_c^2)^2$ .  $R_1 = \Sigma||F_o| - |F_c||/\Sigma|F_o|$  and  $wR_2 = [\Sigma w(F_o^2 - F_c^2)^2/\Sigma wF_o^4]^{\frac{1}{2}}$ .

## Additional thermal expansion data

Table S2: Temperature dependence of unit cell parameters for **1**.

| Temperature | $a / \text{\AA}$ | $b / \text{\AA}$ | $c / \text{\AA}$ | $\beta / ^\circ$ |
|-------------|------------------|------------------|------------------|------------------|
| 105         | 15.267(3)        | 6.644(1)         | 13.936(3)        | 115.469(2)       |
| 120         | 15.280(3)        | 6.237(1)         | 13.961(3)        | 115.409(2)       |
| 135         | 15.293(3)        | 6.233(1)         | 13.986(3)        | 115.351(2)       |
| 150         | 15.304(3)        | 6.227(1)         | 14.009(3)        | 115.285(2)       |
| 165         | 15.311(3)        | 6.221(1)         | 14.032(3)        | 115.210(2)       |
| 180         | 15.324(2)        | 6.217(1)         | 14.062(2)        | 115.143(2)       |
| 195         | 15.343(1)        | 6.209(1)         | 14.092(1)        | 115.096(1)       |
| 210         | 15.366(1)        | 6.203(1)         | 14.128(1)        | 115.027(1)       |
| 225         | 15.383(1)        | 6.195(1)         | 14.159(1)        | 114.957(1)       |
| 240         | 15.406(1)        | 6.189(1)         | 14.194(1)        | 114.899(1)       |
| 255         | 15.429(1)        | 6.181(1)         | 14.227(1)        | 114.832(1)       |
| 270         | 15.453(1)        | 6.174(1)         | 14.261(1)        | 114.762(1)       |
| 285         | 15.486(1)        | 6.170(1)         | 14.305(1)        | 114.700(1)       |
| 300         | 15.513(1)        | 6.164(1)         | 14.341(1)        | 114.626(1)       |

Table S3: Temperature dependence of unit cell parameters for **2**.

| Temperature | $a / \text{\AA}$ | $b / \text{\AA}$ | $c / \text{\AA}$ | $\beta / ^\circ$ |
|-------------|------------------|------------------|------------------|------------------|
| 105         | 15.473(1)        | 5.960(1)         | 14.768(1)        | 113.019(1)       |
| 120         | 15.484(1)        | 5.952(1)         | 14.793(1)        | 112.936(1)       |
| 135         | 15.500(1)        | 5.946(1)         | 14.822(1)        | 112.853(1)       |
| 150         | 15.518(1)        | 5.939(1)         | 14.853(1)        | 112.769(1)       |
| 165         | 15.538(1)        | 5.934(1)         | 14.886(1)        | 112.681(1)       |
| 180         | 15.554(1)        | 5.927(1)         | 14.916(1)        | 112.593(1)       |
| 195         | 15.575(1)        | 5.919(1)         | 14.952(1)        | 112.493(1)       |
| 210         | 15.595(1)        | 5.910(1)         | 14.988(1)        | 112.395(1)       |
| 225         | 15.617(1)        | 5.903(1)         | 15.026(1)        | 112.296(1)       |
| 240         | 15.637(1)        | 5.895(1)         | 15.063(1)        | 112.200(1)       |
| 255         | 15.654(1)        | 5.886(1)         | 15.095(1)        | 112.106(1)       |
| 270         | 15.678(1)        | 5.879(1)         | 15.132(1)        | 112.012(1)       |
| 285         | 15.706(1)        | 5.869(1)         | 15.172(1)        | 111.897(1)       |
| 300         | 15.729(1)        | 5.861(1)         | 15.207(1)        | 111.806(1)       |

Table S4: Temperature dependence of unit cell parameters for **3**.

| Temperature | $a / \text{\AA}$ | $b / \text{\AA}$ | $c / \text{\AA}$ | $\beta / ^\circ$ |
|-------------|------------------|------------------|------------------|------------------|
| 105         | 16.536(2)        | 5.5137(5)        | 15.755(2)        | 108.425(1)       |
| 120         | 16.548(2)        | 5.5114(5)        | 15.776(2)        | 108.368(1)       |
| 135         | 16.556(2)        | 5.5082(5)        | 15.795(1)        | 108.316(1)       |
| 150         | 16.567(2)        | 5.5064(5)        | 15.816(2)        | 108.258(1)       |
| 165         | 16.577(2)        | 5.5055(6)        | 15.838(2)        | 108.203(2)       |
| 180         | 16.586(2)        | 5.5039(7)        | 15.861(2)        | 108.146(2)       |
| 195         | 16.591(2)        | 5.5000(6)        | 15.877(2)        | 108.097(2)       |
| 210         | 16.599(1)        | 5.4965(4)        | 15.898(1)        | 108.046(1)       |
| 225         | 16.610(1)        | 5.4943(4)        | 15.922(1)        | 108.001(1)       |
| 240         | 16.618(1)        | 5.4925(4)        | 15.943(1)        | 107.962(1)       |
| 255         | 16.630(1)        | 5.4922(4)        | 15.966(1)        | 107.916(1)       |
| 270         | 16.640(1)        | 5.4922(4)        | 15.992(1)        | 107.872(1)       |
| 285         | 16.650(1)        | 5.4904(4)        | 16.012(1)        | 107.820(1)       |
| 300         | 16.658(1)        | 5.4893(4)        | 16.033(1)        | 107.777(1)       |

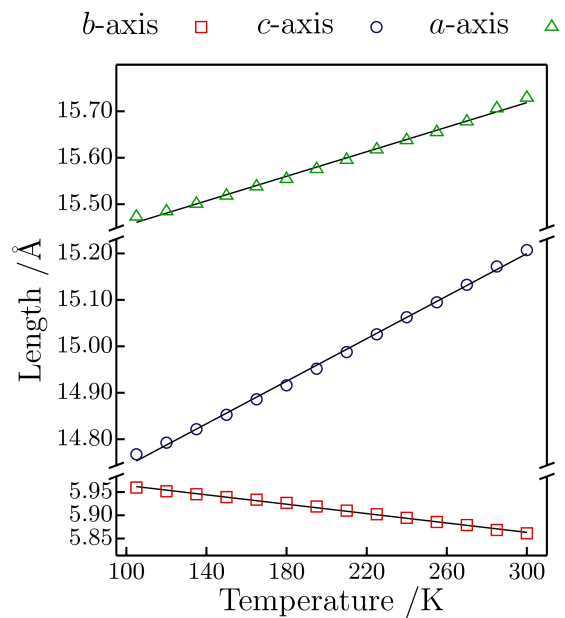

Figure S1: Plot of unit cell length parameter vs. temperature for **2** (error bars are within the points). Solid lines depict linear least squares fits to the data.

Table S5: Thermal expansion coefficients  $/\times 10^{-6} \text{ K}^{-1}$  for  $\text{Cu}(\text{MeCN})_2[\text{AuX}_2(\text{CN})_2]$  ( $\text{X} = \text{Cl}, \text{Br}, \text{I}$ ) along primary orthogonal axes.

| Compound | $\alpha_{X1}$ | $\alpha_{X2}$ | $\alpha_{X3}$ |
|----------|---------------|---------------|---------------|
| <b>1</b> | 76(4)         | -66.1(14)     | 190(4)        |
| <b>2</b> | 71.7(17)      | -84.8(14)     | 215(3)        |
| <b>3</b> | 31.7(4)       | -23.6(11)     | 115.2(3)      |

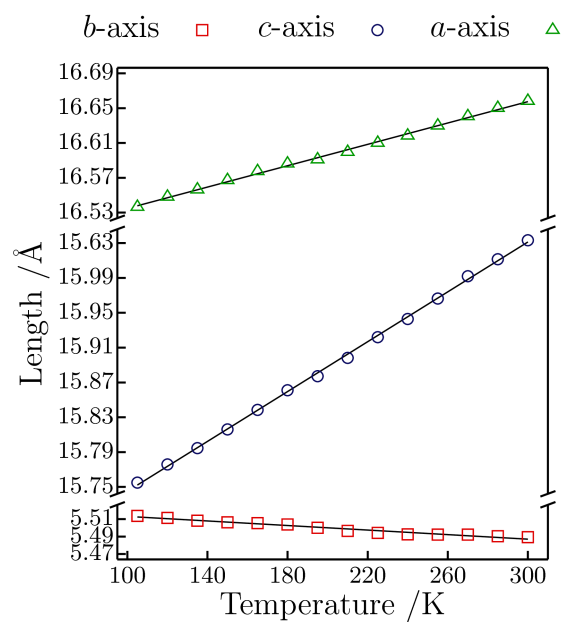

Figure S2: Plot of unit cell length parameter vs. temperature for **3** (error bars are within the points). Solid lines depict linear least squares fits to the data.

## References

- (1) Ovens, J. S.; Leznoff, D. B. *Dalton Trans.* **2011**, *40*, 4140–6.
- (2) Ovens, J. S.; Geisheimer, A. R.; Bokov, A. A.; Ye, Z.-G.; Leznoff, D. B. *Inorg. Chem.* **2010**, *49*, 9609–16.
- (3) Ovens, J. S.; Truong, K. N.; Leznoff, D. B. *Dalton Trans.* **2012**, *41*, 1345–51.
- (4) Ovens, J. S.; Truong, K. N.; Leznoff, D. B. *Inorg. Chim. Acta* **2013**, *403*, 127–135.
- (5) Mason, W. R. *Inorg. Chem.* **1970**, *9*, 2688–91.
- (6) Jones, L. H. *Inorg. Chem.* **1964**, *3*, 1581–6.
- (7) Liang, H.-C.; Karlin, K. D.; Dyson, R.; Kaderli, S.; Jung, B.; Zuberbühler, A. D. *Inorg. Chem.* **2000**, *39*, 5884–94.
- (8) Hübschle, C. B.; Sheldrick, G. M.; Dittrich, B. *J. Appl. Crystallogr.* **2011**, *44*, 1281–4.
- (9) Cliffe, M. J.; Goodwin, A. L. *J. Appl. Crystallogr.* **2012**, *45*, 1321–1329.
- (10) Farrugia, L. J. *J. Appl. Crystallogr.* **1997**, *30*, 565.
- (11) Fenn, T. D.; Ringe, D.; Petsko, G. a. *J. Appl. Crystallogr.* **2003**, *36*, 944–7.
